# Supplementary material
Source: PubMed Central journal article supplement (PMC5728414)
Supplement: NIHMS917517-supplement-1.pdf [file NIHMS917517-supplement-1.pdf]

## **Supplemental Information**

### **Supplemental Figures and Figure Legends**

**Figure S1.** Related to Figure 1.

**Figure S2.** Related to Figure 2.

**Figure S3.** Related to Figures 3 and 4.

**Figure S4.** Related to Figure 4.

**Figure S5.** Related to Figures 4 and 5.

**Figure S6.** Related to Figure 6.

**Figure S7.** Related to Figures 6 and 7.

### **Supplemental Tables**

**Table S1. Clonal Lineage-Tracing Data.** Related to Figure 1.

**Table S2. SCONE Performance Metrics.** Related to Figures 2 and 7.

**Table S3. Differential Gene Expression Between Transitional and Activated HBCs, WT regeneration clusters, TFs, HBC\*1 DE.** Related to Figures 3, 4, S4, S5, Table S5.

**Table S4. Gene Set Enrichment Analysis Results.** Related to Figure 3.

**Table S5. Transcription Factor Binding Motif Analysis of the Promoters of Genes Enriched in HBC\*1.** Related to Figures 4, S4, S5.

**Table S6. Differential Gene Expression Analysis of Wild Type vs. Sox2 Conditional Knockout HBCs.** Related to Figures 7 and S7.

**Table S7. Oligos Used to Synthesize RNA In Situ Hybridization Probes and Cell Cycle Gene Set.** Related to Figure S3 and 3.

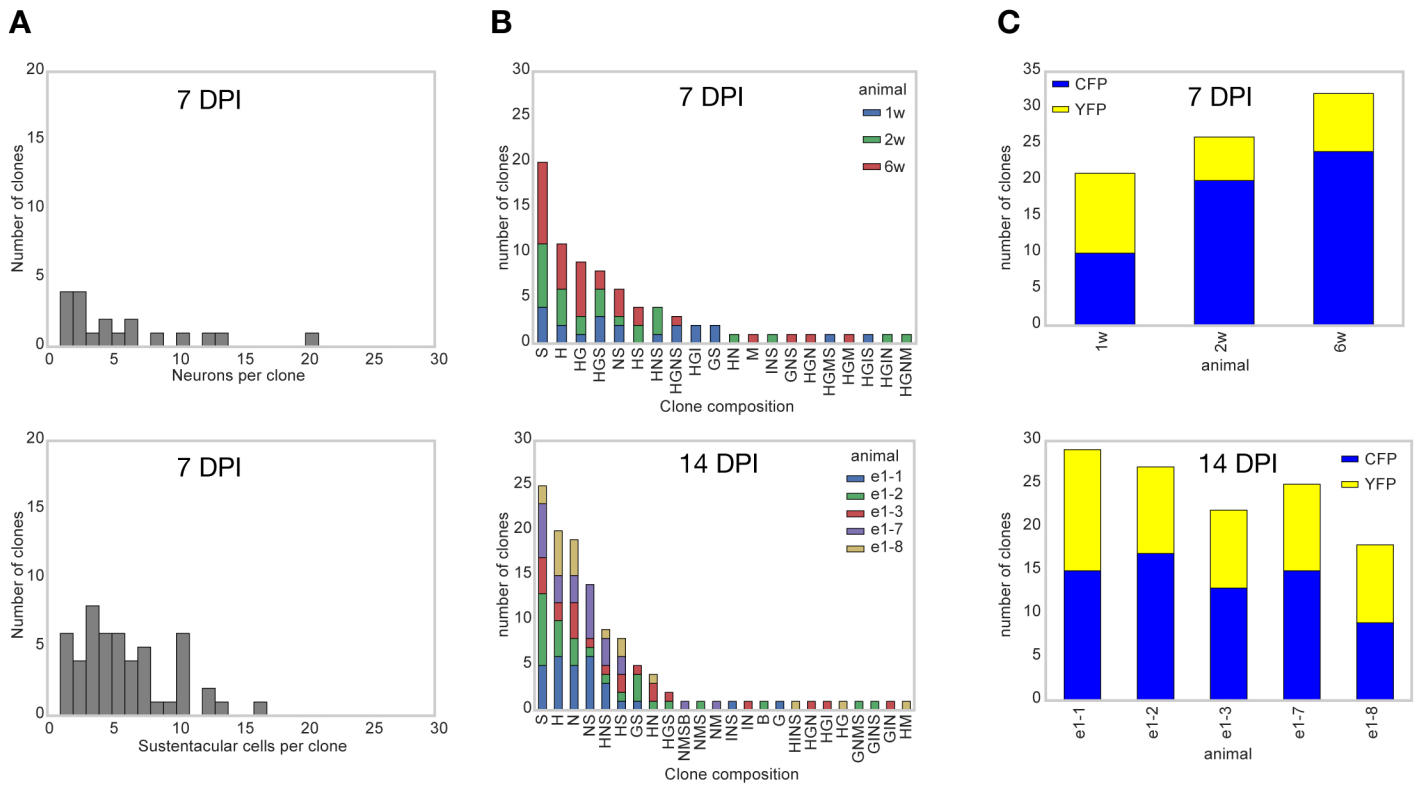

Figure S1

**Figure S1.** Related to Figure 1.

**(A)** Distributions of neurons per clone (top) and sustentacular cells per clone (bottom) in clones possessing at least one of each cell type, respectively, at 7 DPI. **(B)** Histogram of clone compositions at 7 DPI (top) and 14 DPI (bottom), according to the presence of at least one cell of a given cell type. Key for cell types: H, HBC; G, GBC; I, immediate neuronal precursor; N, neuron; M, microvillous cell; S, sustentacular cell; B, Bowman's gland. **(C)** Prevalence of clones lineage-traced by membrane CFP (blue) or cytoplasmic YFP (yellow), by animal, at 7 DPI (top) and 14 DPI (bottom).

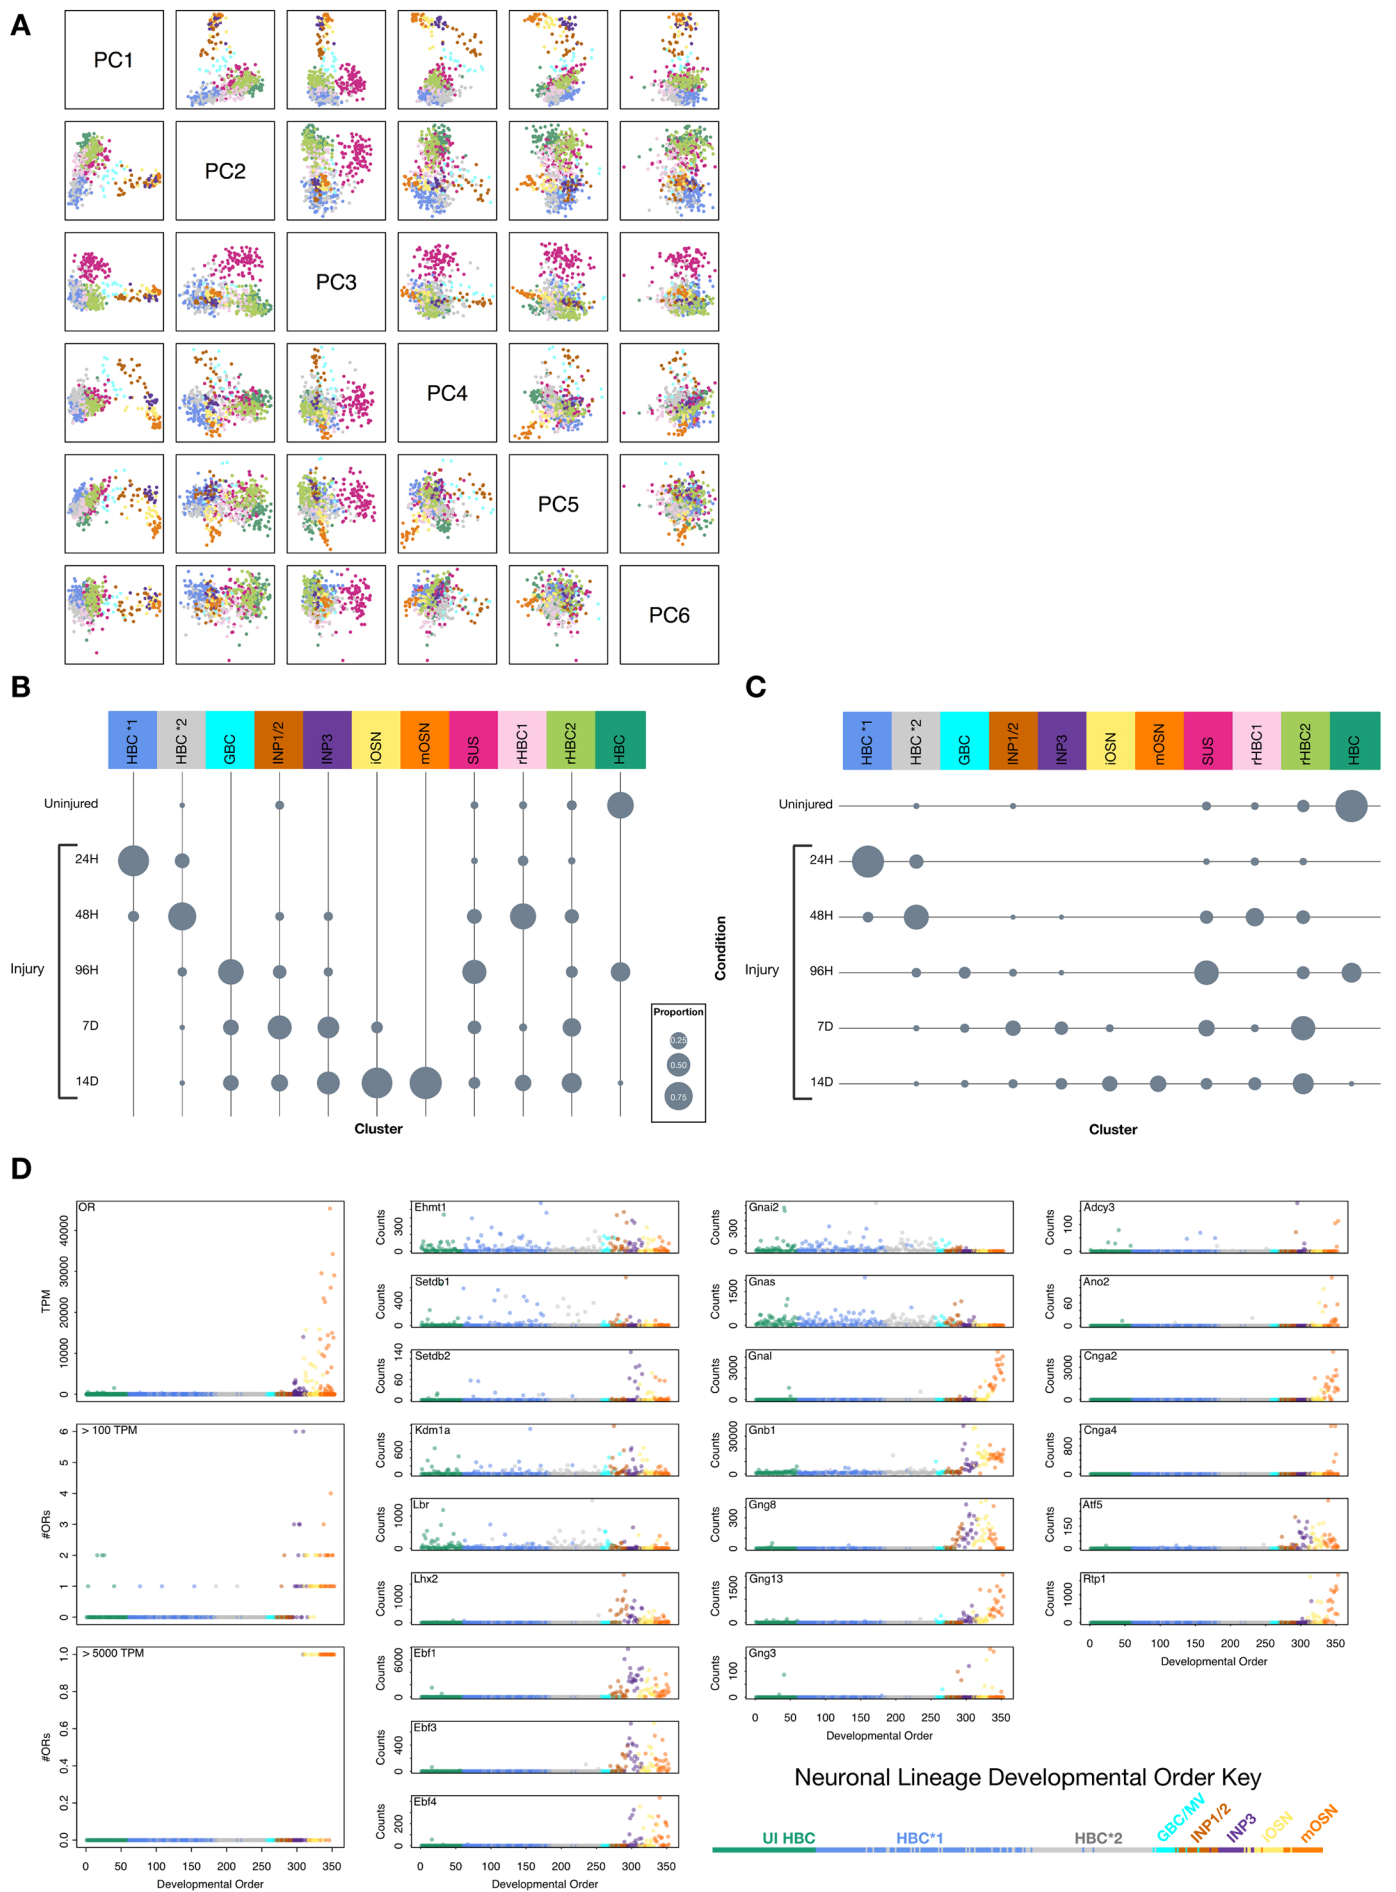

**Figure S2**



**Figure S2.** Related to Figure 2.

**(A)** The first five principal components of the expression matrix of all detected genes effectively separate the clusters and serve as input for Slingshot. **(B, C)** Like steady-state differentiation (Fletcher et al. 2017), regeneration is generally asynchronous, as demonstrated by the partial overlap of experimental condition and cell cluster identity, but cells from early time-points populate the activated HBC clusters. In (B), the size of the circles reflects the proportion of cells from each cluster derived from each experimental condition. In (C), the size of the circles reflects the proportion of cells from each experimental condition that contribute to each cluster. Most experimental conditions contribute to multiple clusters, while the uninjured HBCs predominantly populate the resting HBC cluster. **(D)** Expression of odorant receptors (ORs) in the neuronal lineage, with cells sorted by their developmental order. On the left, the top plot reveals significant upregulation of OR expression in mature olfactory sensory neurons (mOSN; orange); the second and third plots show the number of OR genes expressed per cell at different thresholds of expression. Multiple ORs are detected at the third immediate neuronal precursor stage (INP3; purple); as cells mature, the pattern shifts to high level expression of one OR per cell, starting in the immature olfactory sensory neuron (iOSN) stage (yellow). The remaining plots display selected transcription factors, chromatin modifiers and other signaling molecules relevant to OR gene expression.

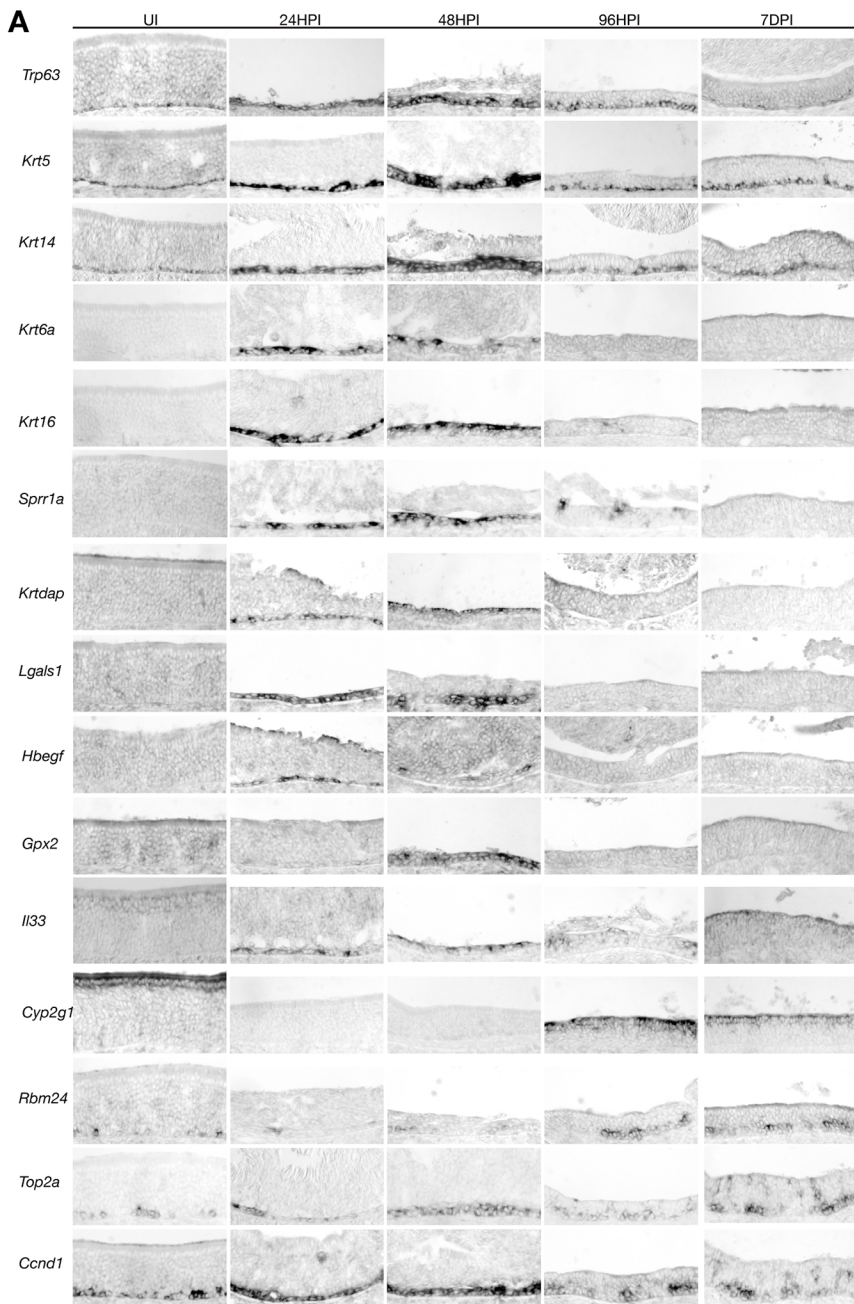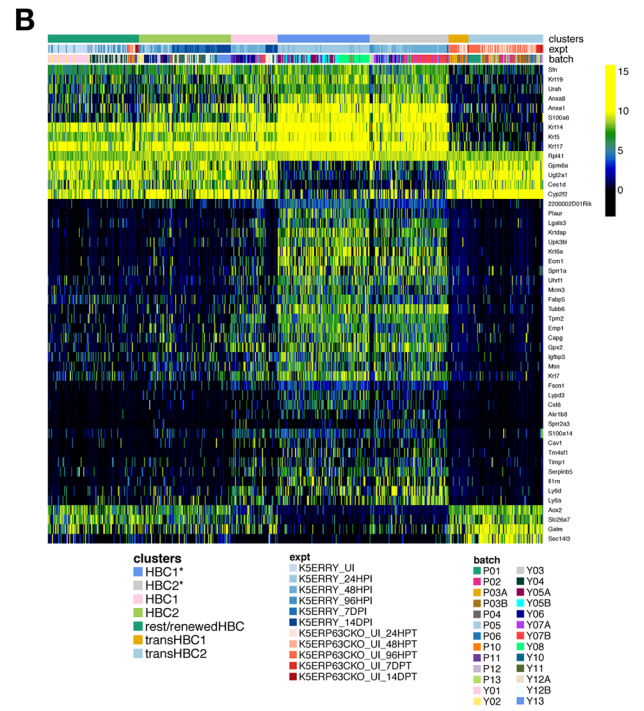

**C**

| Gene Set                                    | P-value, enrichment in: resting HBC cluster | P-value, enrichment in: HBC*1 cluster | P-value, enrichment in: HBC*2 cluster |
|---------------------------------------------|---------------------------------------------|---------------------------------------|---------------------------------------|
| HALLMARK_EPITH_MESENC_H_TRANSITION          | 1.00E-07                                    | 0.0097035                             | 0.0020842                             |
| HALLMARK_TNFA_SIGNALING_VIA_NFKB            | 1.00E-07                                    | 0.0001157                             | 0.0287206                             |
| REACTOME_INTEGRIN_CELL_SURFACE_INTERACTIONS | 1.00E-07                                    | 0.0047554                             | 0.0183624                             |
| KEGG_ECM_RECEPTOR_INTERACTION               | 2.00E-07                                    | 0.1019771                             | 0.0206633                             |
| PID_MYC_REPRESS_PATHWAY                     | 2.00E-07                                    | 0.1384512                             | 0.0186585                             |
| HALLMARK_MYC_TARGETS_V1                     | 0.9849404                                   | 1.00E-07                              | 1.00E-07                              |
| HALLMARK_MYC_TARGETS_V2                     | 0.9539475                                   | 1.00E-07                              | 2.00E-07                              |
| KEGG_RIBOSOME                               | 0.0071245                                   | 1.00E-07                              | 6.60E-06                              |
| REACTOME_TRANSLATION                        | 0.0456086                                   | 1.00E-07                              | 1.00E-07                              |
| HALLMARK_MTORC1_SIGNALING                   | 0.0692145                                   | 1.00E-07                              | 1.00E-07                              |
| HALLMARK_E2F_TARGETS                        | 0.9999113                                   | 0.0148733                             | 1.00E-07                              |
| REACTOME_CELL_CYCLE                         | 0.9999997                                   | 0.0212022                             | 1.00E-07                              |
| REACTOME_MITOTIC_M_M_G1_PHASES              | 0.9999985                                   | 0.000796                              | 1.00E-07                              |
| REACTOME_DNA_REPLICATION                    | 0.9999979                                   | 0.0003819                             | 1.00E-07                              |
| REACTOME_CELL_CYCLE_CHECKPOINTS             | 0.9999943                                   | 7.00E-07                              | 1.00E-07                              |

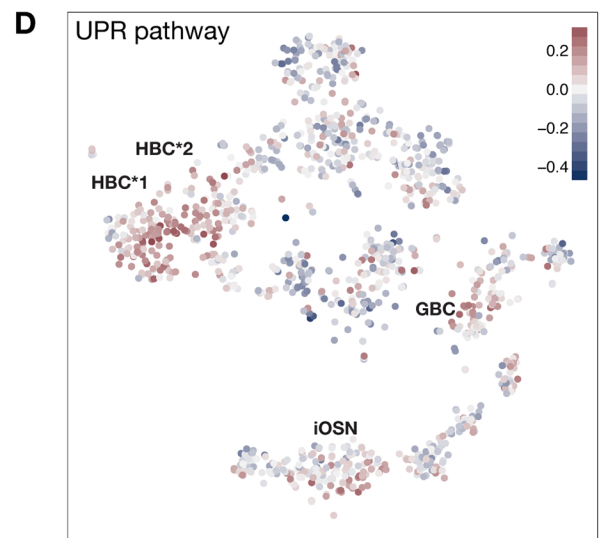

Figure S3

**Figure S3.** Related to Figures 3 and 4.

**(A)** RNA in situ hybridizations for selected marker genes in uninjured olfactory epithelium (UI) and at 24 hours, 48 hours, 96 hours and 7 days following injury with methimazole. Beginning at 24 HPI, activated HBCs express markers associated with wound response and proliferation, which become more apically restricted after 48 HPI. **(B)** Heatmap of the top 50 differentially expressed genes between the activated HBCs from regeneration and the transitional HBCs from uninjured differentiation. The top color bar indicates the type of HBC cluster/celltype. The experimental condition/timepoint for each cell is indicated in by the color bar labeled “expt”. Batch is discussed in the STAR Methods and refers to the biological replicate FACS run for each experiment. **(C)** Examples of enriched gene sets for the resting HBCs, HBC\*1, and HBC\*2, identified by gene set enrichment analysis (GSEA) of the wildtype regeneration data. **(D)** This t-SNE plot indicates the enrichment of the UPR gene set identified by GSEA in the cells of the wildtype regeneration experiment.

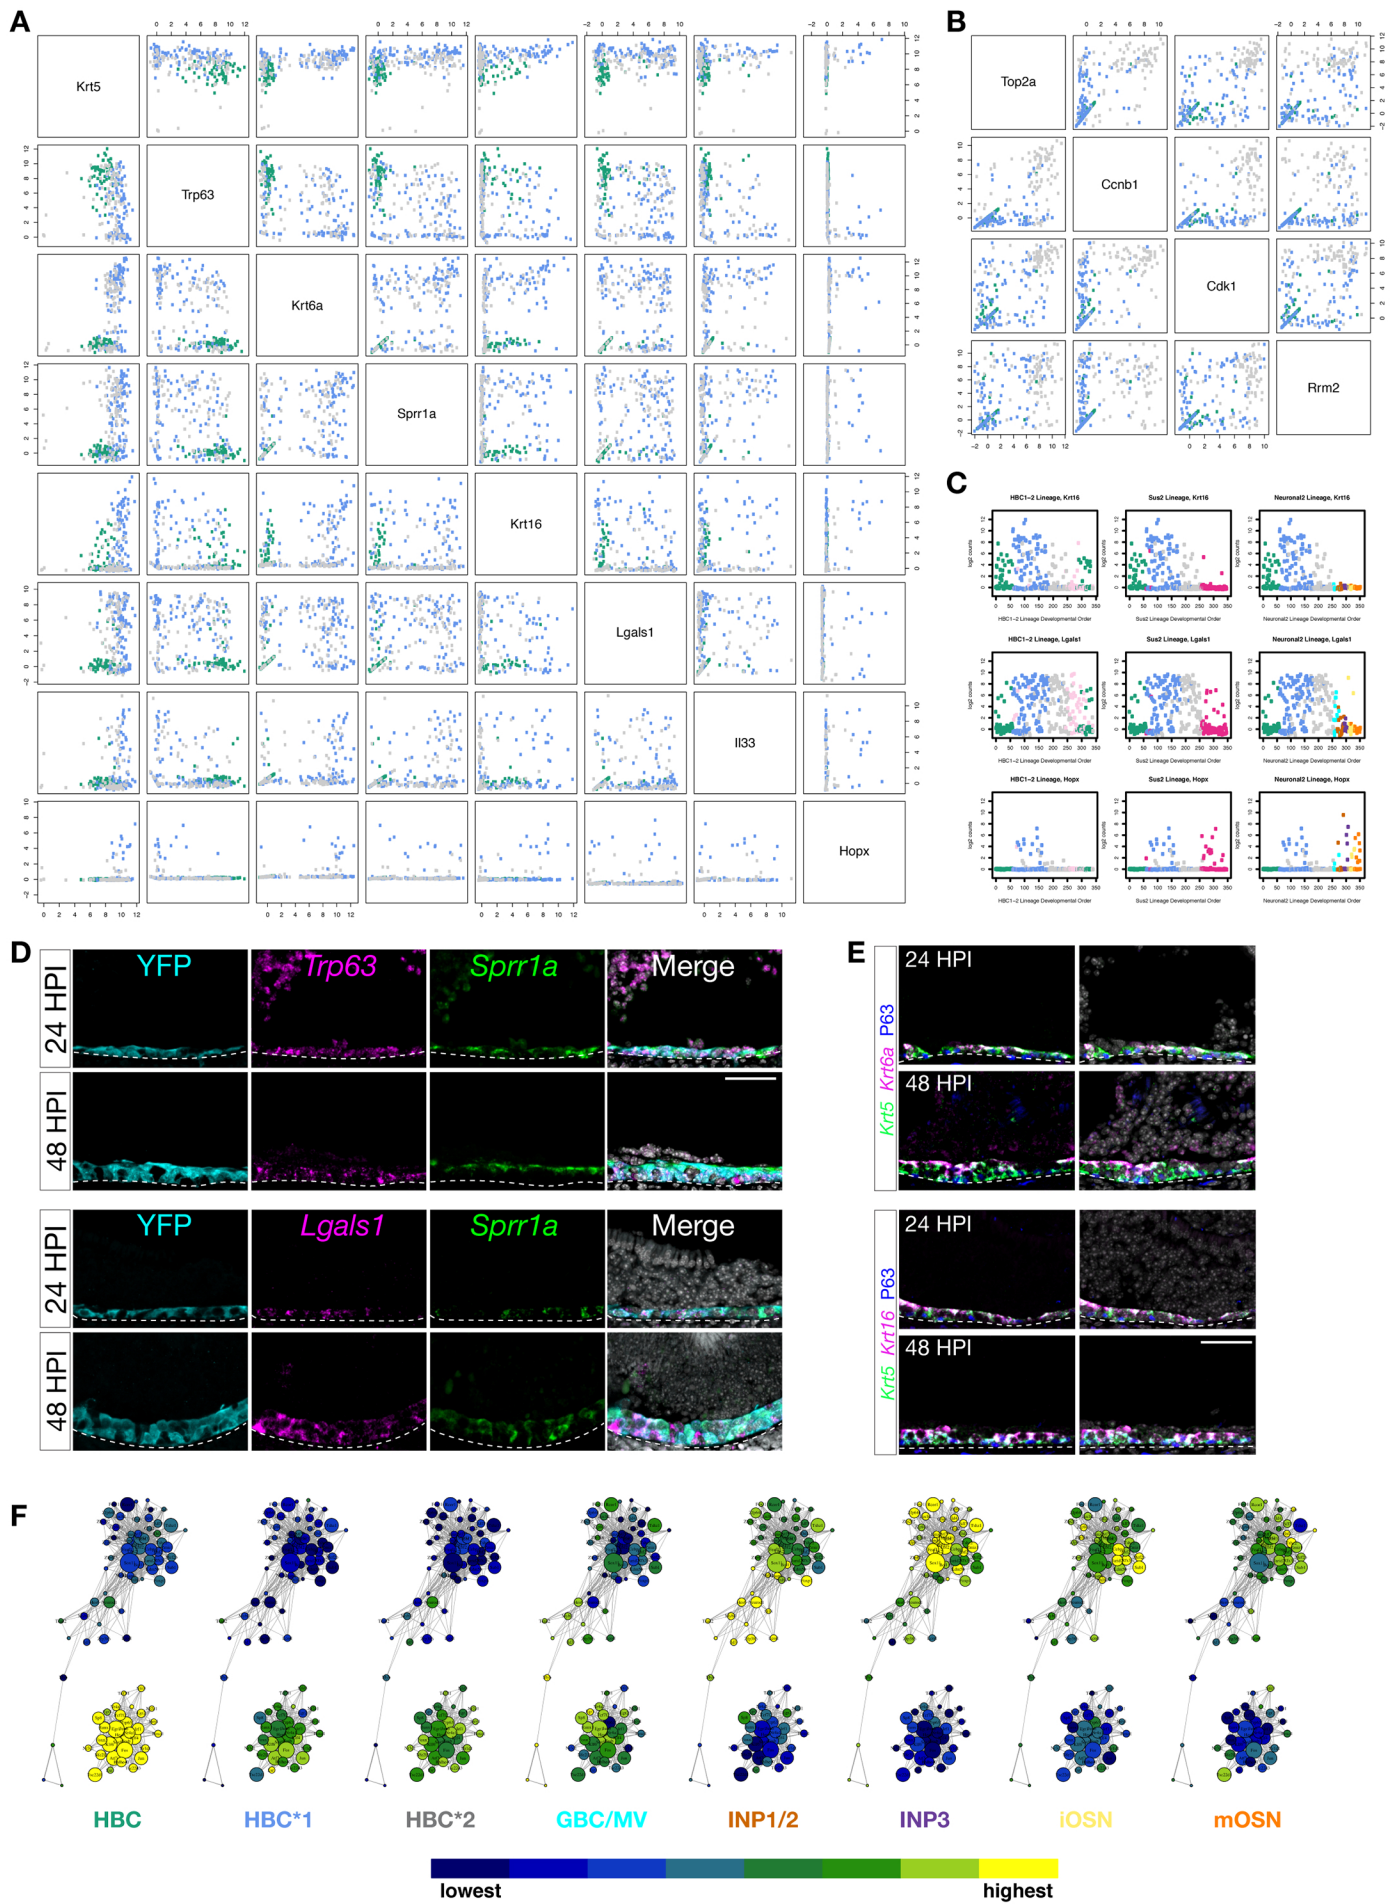

Figure S4

**Figure S4.** Related to Figure 4.

**(A)** Co-expression of selected marker genes in resting and activated HBCs. Although *Krt5* expression remains high through all HBC stages, there is heterogeneity in expression of other stem cell markers and wound response genes. **(B)** Cell cycle-associated genes show more coordinated expression in the HBC\*2 cluster (grey), in comparison to other HBC clusters. **(C)** *Krt16*, *Lgals1*, and *Hopx* are enriched in a subset of activated HBCs. Color scheme of cluster assignments in panels A-C as in Figure 2. **(D)** Heterogeneity of activated HBCs demonstrated by partial overlap of markers at 24 and 48 HPI. YFP was detected by immunohistochemistry using an anti-GFP antibody and marker genes were detected by RNA in situ hybridization. **(E)** *Krt6a* and *Krt16* mark a subset of *Krt5*<sup>+</sup> HBCs, which have variable levels of P63 expression. P63 was detected by immunohistochemistry using an anti-P63 antibody and other marker genes were detected by RNA in situ hybridization. **(F)** Connectivity graph for differentially expressed transcription factors in the neuronal lineage, colored by ranked average expression with respect to other clusters in the lineage. See also Table S5.



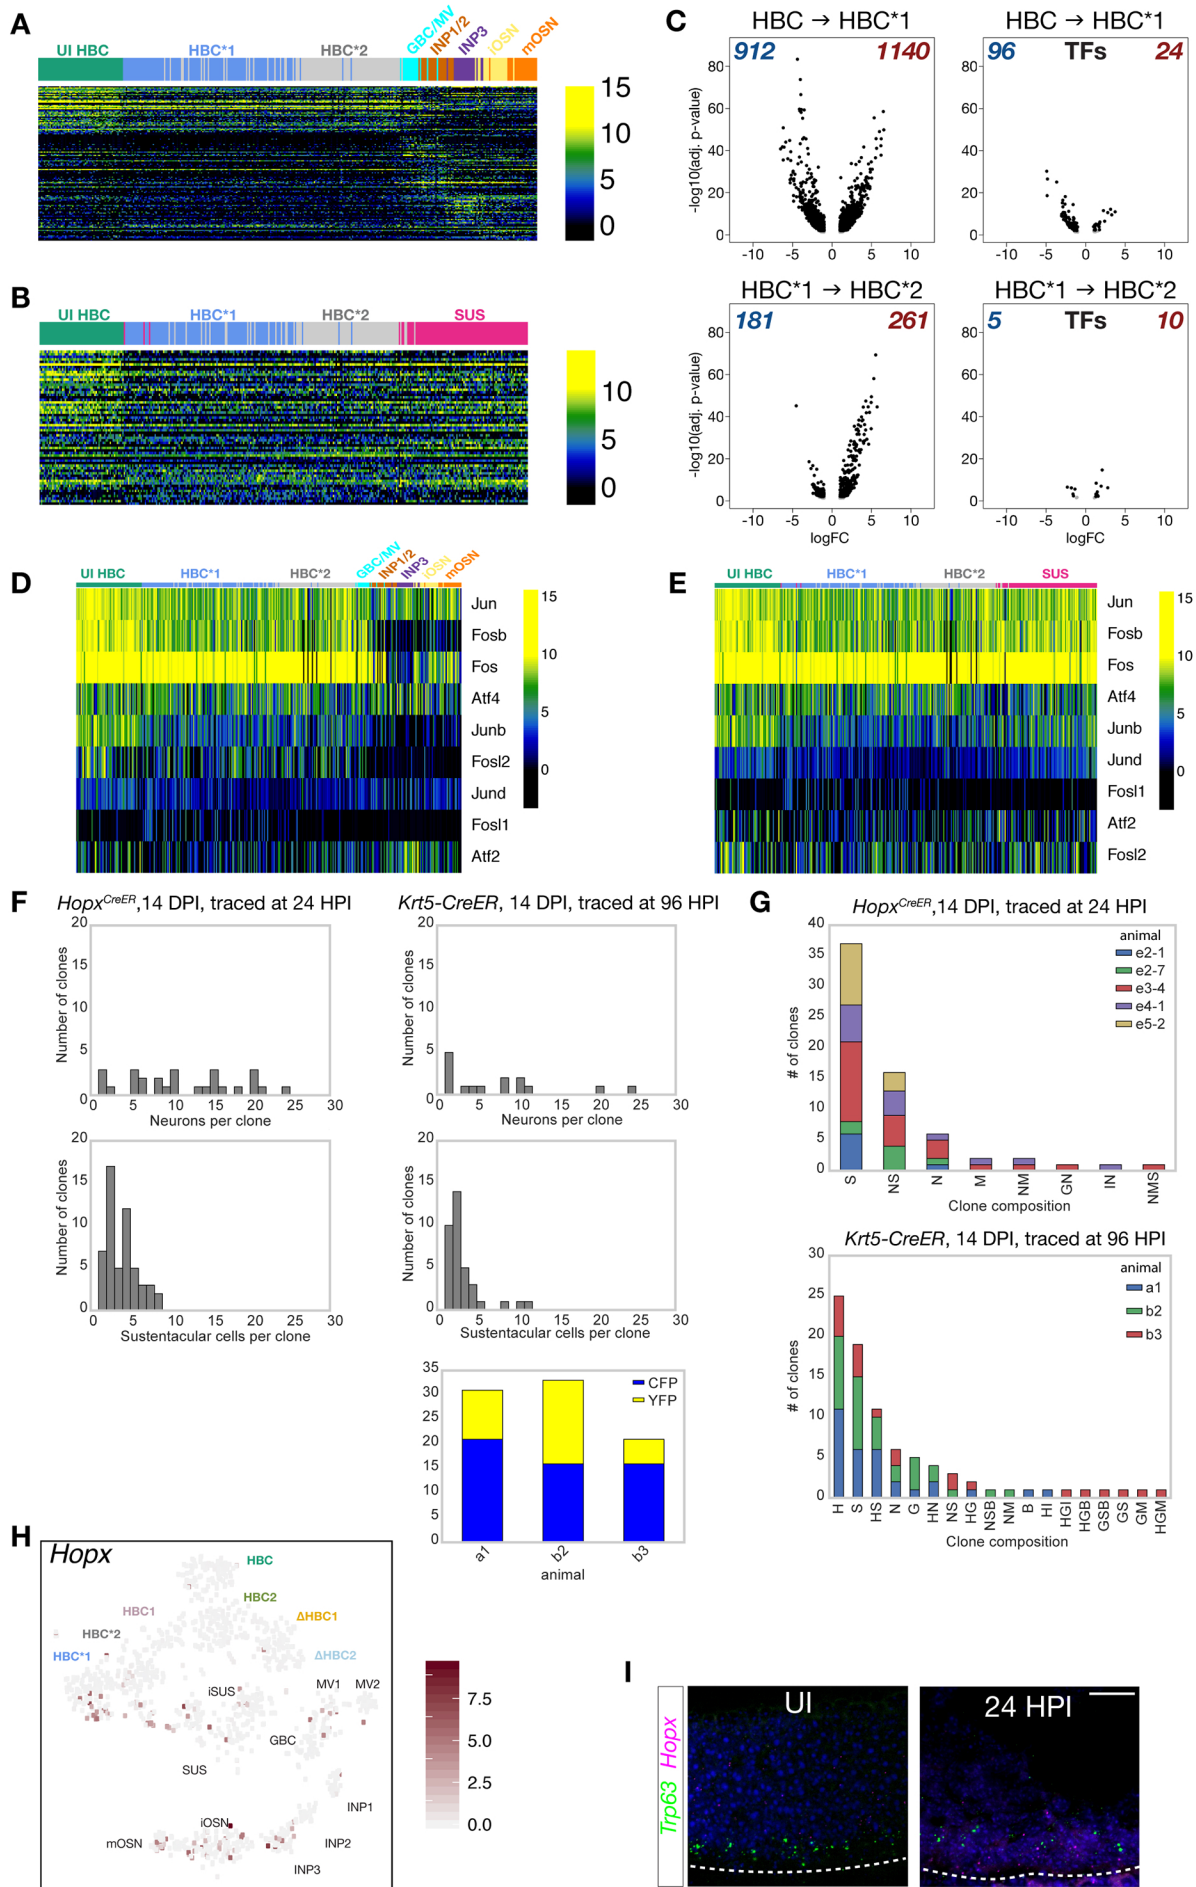

Figure S5

**Figure S5.** Related to Figures 4 and 5.

**(A, B)** Differentially expressed transcription factors in the neuronal (A) and sustentacular cell (B) lineages. As in steady state differentiation, the neuronal lineage during regeneration exhibits step-like transitions in between cell types. **(C)** Volcano plots of  $-\log_{10}$  adjusted p-value ( $-\log_{10}(\text{adj. p-value})$ ) versus  $\log_2$  fold-change ( $\log_2\text{FC}$ ) between early HBC clusters. The plots display the number of differentially expressed genes between the clusters at each transition in the lineage (genes with  $\text{adj. p-value} < 0.01$  and  $\log_2\text{FC} > 1$  are shown in black). Up-regulated genes are shown in red text and down-regulated in blue. *Limma* was used for differential expression, and the p-values were adjusted for multiple testing using the Benjamini-Hochberg procedure (see STAR Methods). The step from resting HBCs to activated HBCs is marked by both downregulation and upregulation of many genes, while fewer changes occur between the HBC\*1 and HBC\*2 states. In both cases, relatively few of these differentially expressed genes are transcription factors. See Table S3. **(D, E)** Expression of AP-1 transcription factors in the neuronal (D) and sustentacular cell (E) lineages. **(F)** Distributions of neurons per clone (top) and sustentacular cells per clone (middle) in clones possessing at least one of each cell type, respectively, in the *Hopx<sup>CreER</sup>* and *Krt5-CreER* late-tracing experiments. Data for the number of CFP and YFP clones in each animal for the latter experiment are presented (bottom). **(G)** Histogram of clone compositions in the *Hopx<sup>CreER</sup>* (top) and *Krt5-CreER* late-tracing (bottom) experiments, according to the presence of at least one cell of a given cell type. Key for cell types: H, HBC; G, GBC; I, immediate neuronal precursor; N, neuron; M, microvillous cell; S, sustentacular cell; B, Bowman's gland. **(H)** This t-SNE plot shows expression of *Hopx* in the combined dataset that includes cells from uninjured differentiation and regeneration. Clusters are labeled as in Figure 3. **(I)** RNAscope in situ hybridization was used to detect *Hopx* and *Trp63* mRNA. *Hopx* is expressed at 24 HPI in a subset of activated HBCs but is essentially undetectable in resting HBCs prior to injury.

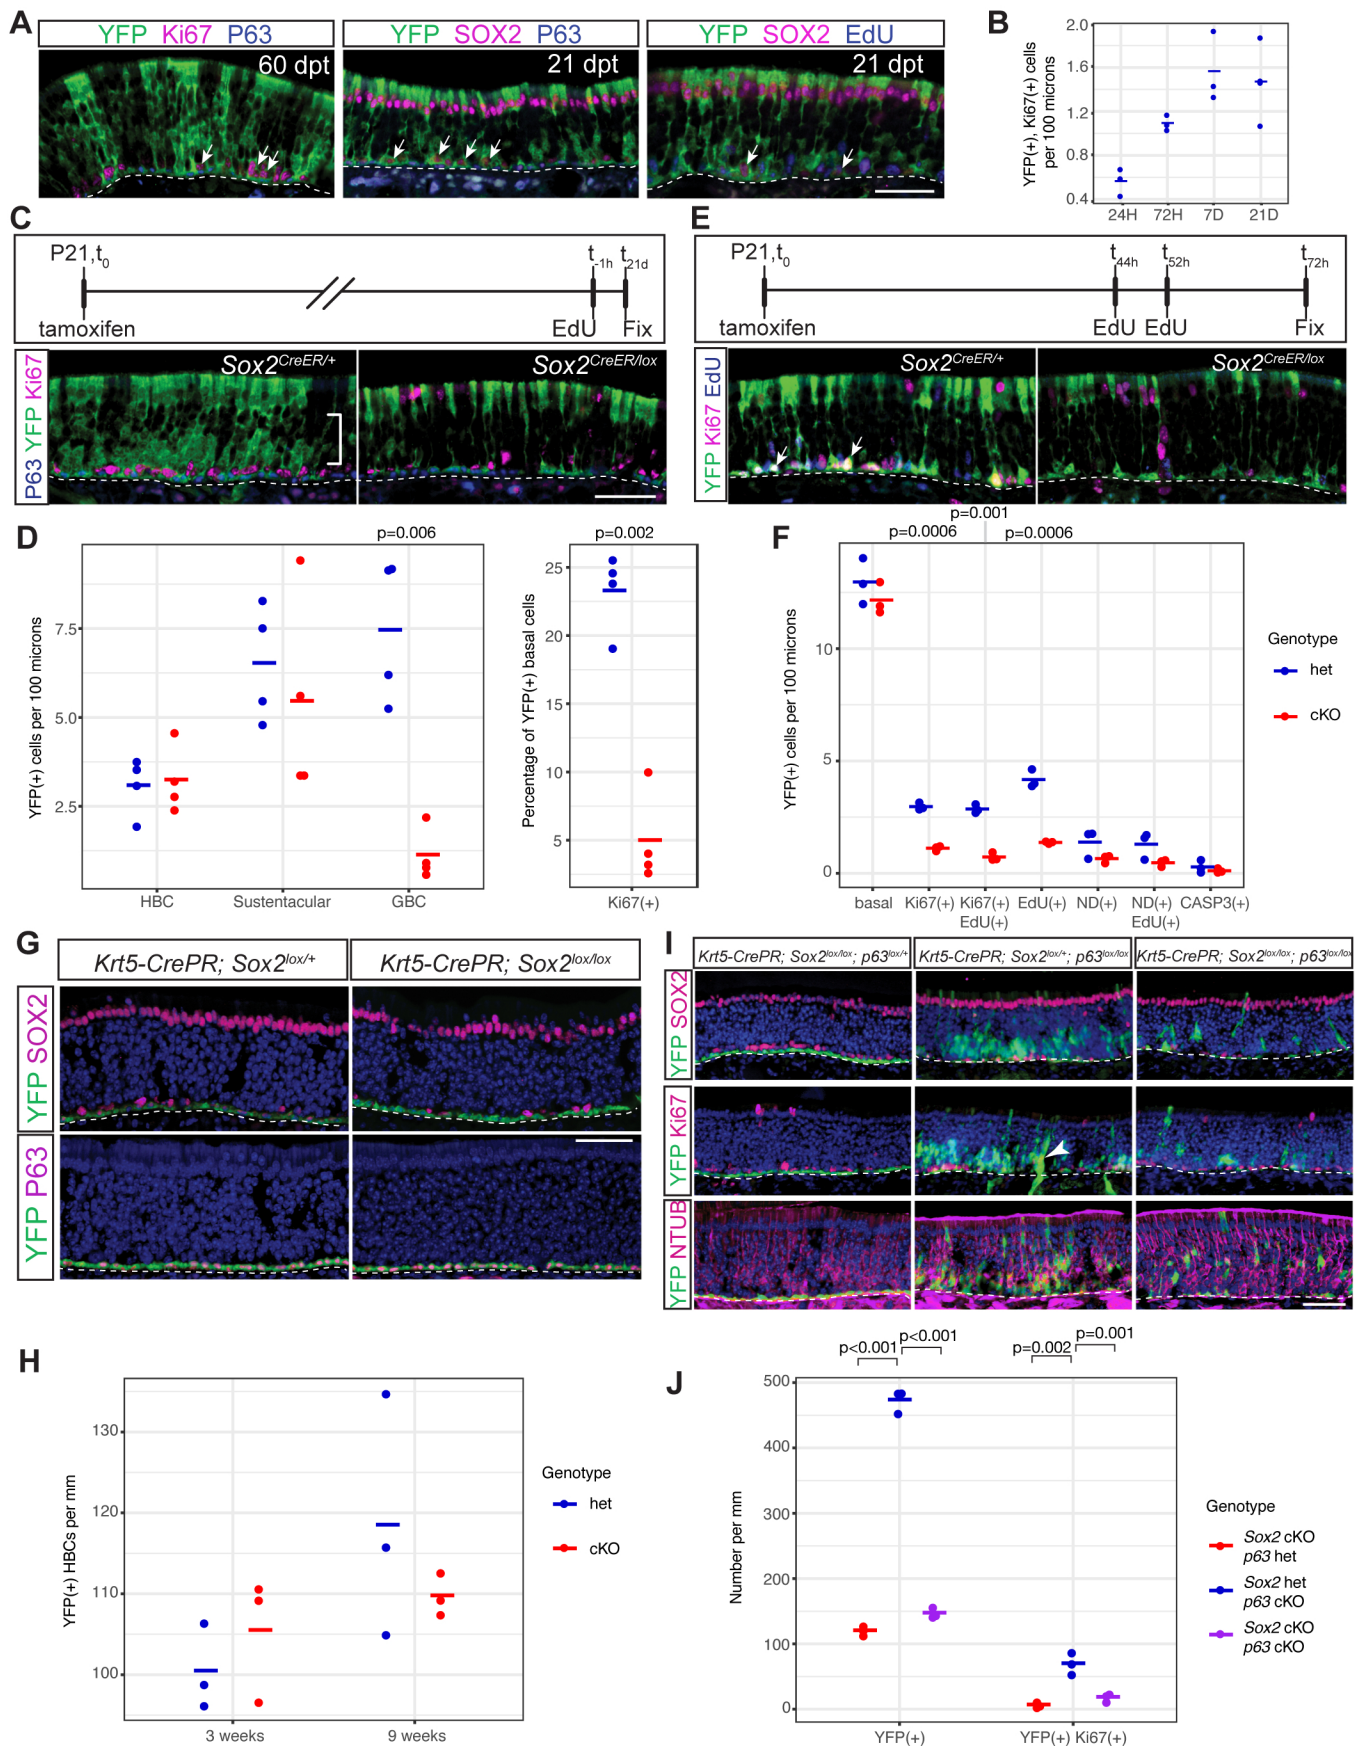

Figure S6



**Figure S6.** Related to Figure 6.

**(A)**  $Sox2^{CreER/+}; Rosa26^{eYFP}$  lineage-traced cells were labeled at P21 by tamoxifen injection and analyzed at 60 or 21 DPT. Even at 60 days post labeling, the  $Sox2(+)$  lineage contains actively cycling suprabasal progenitors (arrows). **(B)** The number of lineage-traced proliferating progenitors over time is plotted; at least three animals were examined per time-point. **(C, D)**  $Sox2^{CreER/+}; Rosa26^{eYFP}$  and  $Sox2^{CreER/lox}; Rosa26^{eYFP}$  lineage-traced cells were analyzed at 21 DPT. There is a marked reduction in the number of GBCs and neurons in the  $Sox2$  conditional knockout in the steady state uninjured olfactory epithelium (compare region of epithelium demarcated by bracket in C); four replicates were examined per genotype. **(E, F)**  $Sox2^{CreER/+}; Rosa26^{eYFP}$  and  $Sox2^{CreER/lox}; Rosa26^{eYFP}$  animals were injected with tamoxifen at P21, then injected with EdU at 44 and 52 HPT to label proliferating cells, and fixed at 72 HPT. The cells from the conditional knockout fail to continue to proliferate and maintain progenitor cells (indicated with arrows in the  $Sox2^{CreER/+}$  background); three replicates were examined per genotype. **(G)** The *Krt5-CrePR* transgene, which is constitutively active in HBCs from approximately P3 onward, was used to conditionally ablate  $Sox2$  in HBCs; this has little, if any effect on homeostatic maintenance in the OE. **(H)** The number of lineage-traced HBCs in the  $Sox2$  conditional knockout is not significantly different from the heterozygote. **(I, J)** Knockout of *p63* in HBCs in a  $Sox2$  heterozygous background causes HBCs to differentiate and produce both sustentacular cells and neurons. Knockout of both  $Sox2$  and *p63* in HBCs causes HBCs to differentiate but produce only sustentacular cells; few proliferative progenitors are observed; three replicates per genotype. Lineage-traced cells comprising a Bowman's Gland is indicated with an arrowhead. P-values were calculated using a negative binomial regression model, and the Benjamini-Hochberg method was used to adjust for multiple testing; see STAR Methods. Scale bars, 50  $\mu$ m.

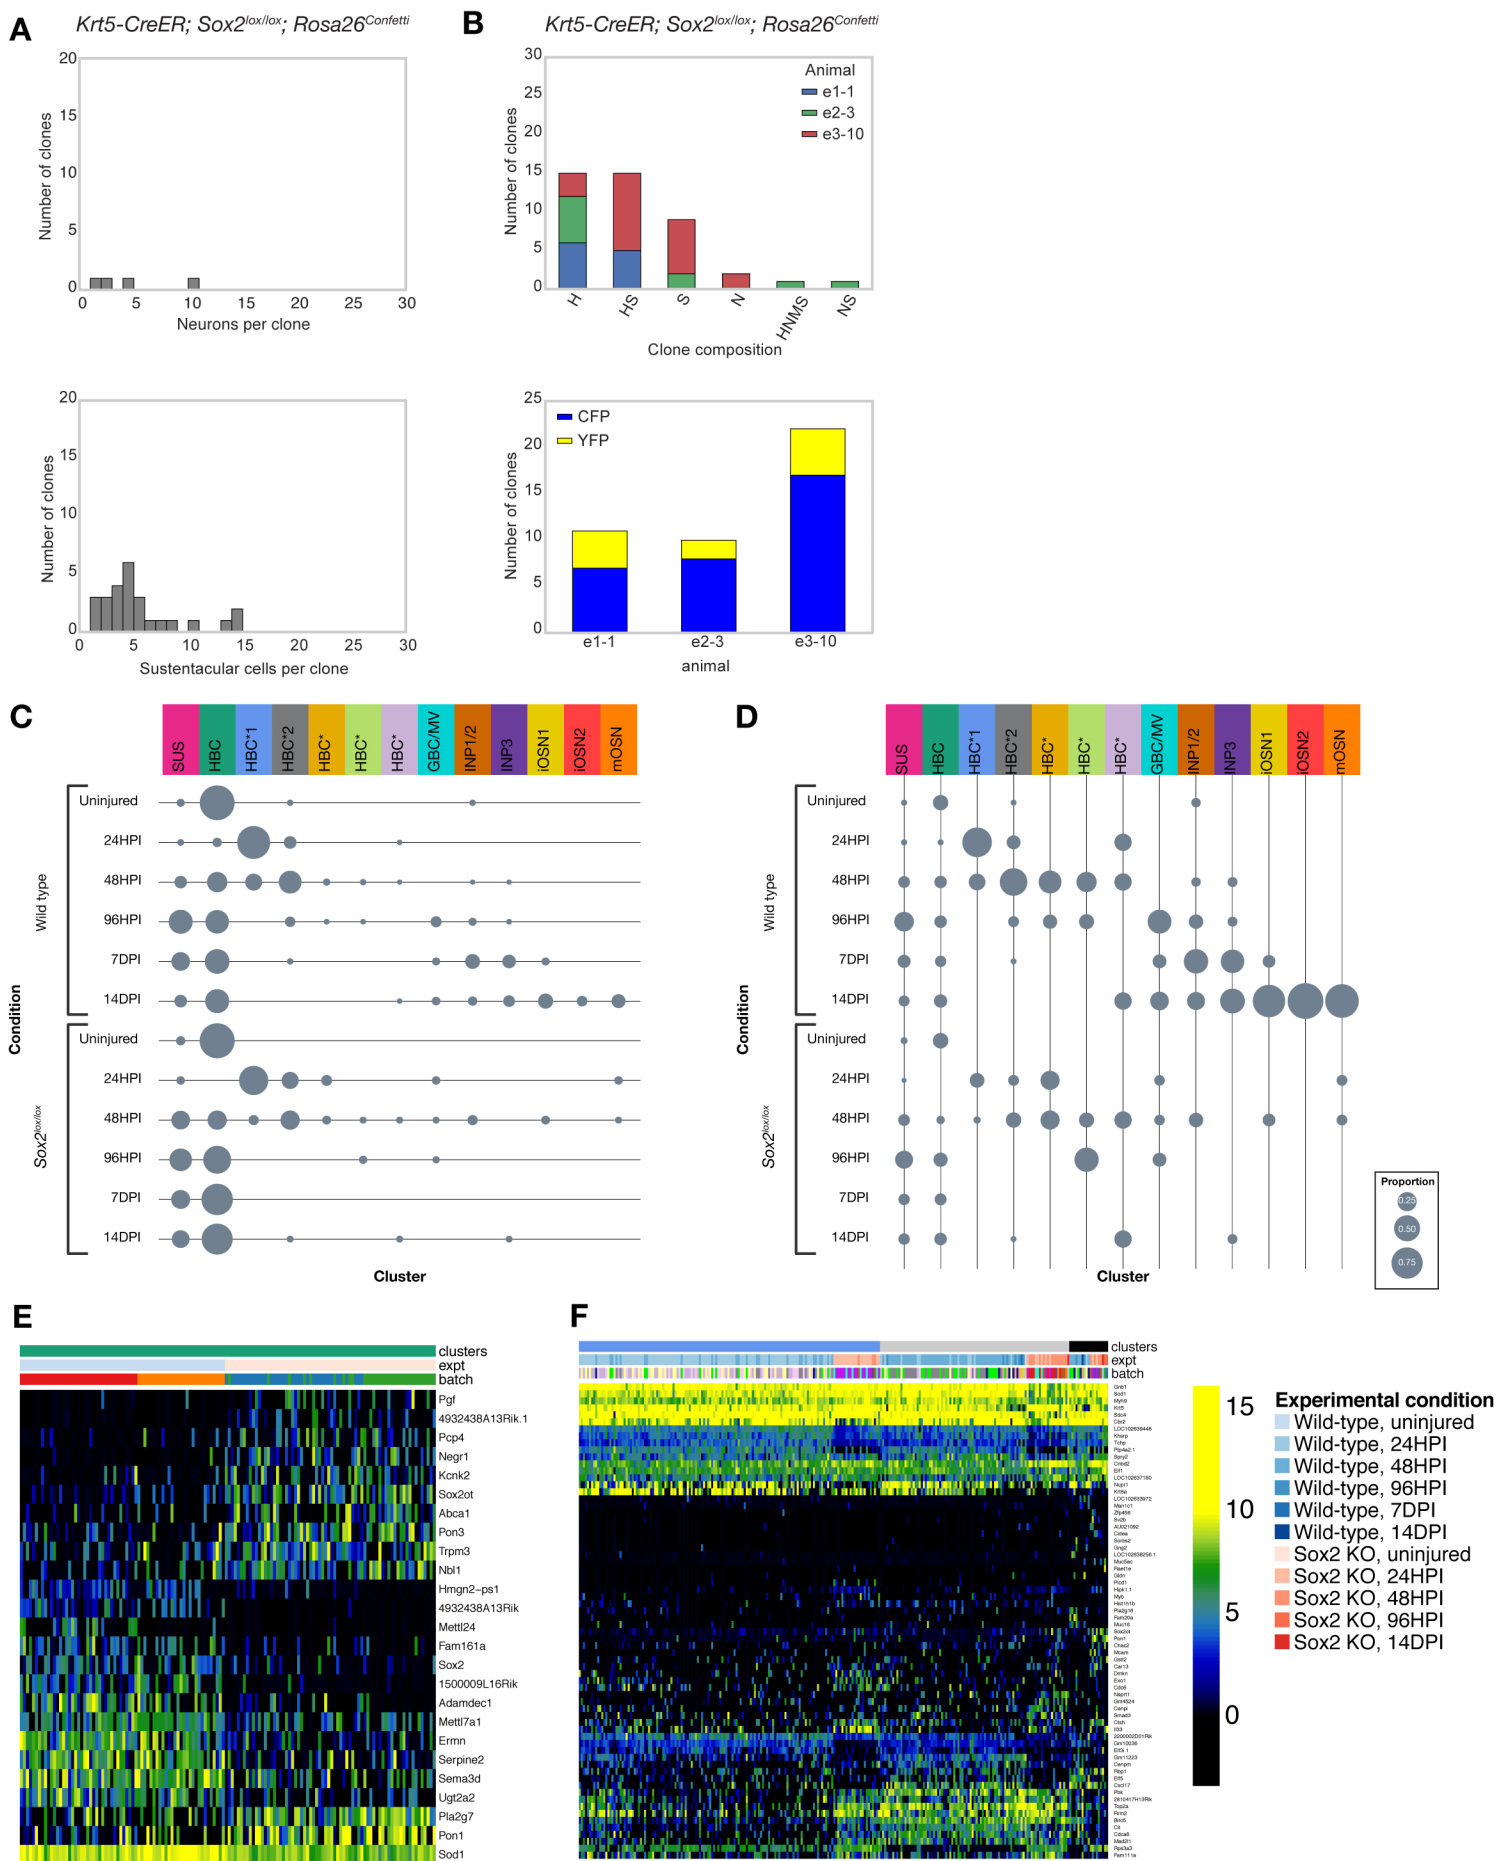

Figure S7

**Figure S7.** Related to Figures 6 and 7.

**(A)** Distributions of neurons per clone (top) and sustentacular cells per clone (bottom) in clones possessing at least one of each cell type, respectively, in the *Sox2* conditional knockout. **(B)** (top) Histogram of clone compositions in the *Sox2* conditional knockout, according to the presence of at least one cell of a given cell type. Key for cell types: H, HBC; G, GBC; I, immediate neuronal precursor; N, neuron; M, microvillous cell; S, sustentacular cell; B, Bowman's gland. Data for the number of CFP and YFP clones in each animal in the *Sox2* conditional knockout (bottom). **(C, D)** Overlap of experimental condition and cell cluster identity. In (C), the size of the circles reflects the proportion of cells from a given experimental condition that contribute to each cluster. In (D), the size of the circles reflects the proportion of cells in each cluster that are derived from each experimental condition. Most of the neuronal lineage is derived from wild-type cells. **(E, F)** Differences between wild type and *Sox2* knockout HBCs are apparent when examining gene expression within each cluster. Wild-type and knockout resting HBCs exhibit clear differences in gene expression prior to injury (E); following injury, the activated HBCs continue to differentially express some genes according to genotype (F).
